# Supplementary material
Source: publisher site journal article supplement (https://static.cambridge.org/content/id/urn:cambridge.org:id:article:S0014479719000085/resource/name/S0014479719000085supp002.docx)
Supplement: Supplementary file 1 [file S0014479719000085supp002.docx]

**Table S2.** A scenario analysis showing the probabilities of exceeding a target yield of 0.84 Mg ha-1 of a farmer using different bean strategies

| **Bean strategy** | **Mean yield (µ)** | **Standard deviation (σ)** | **Probability of exceeding target yield (1 - q)** |
| --- | --- | --- | --- |
| 3 | 1.04 | 0.35 | 0.72 |
| 34 | 0.94 | 0.28 | 0.64 |
| 23 | 0.88 | 0.25 | 0.57 |
| 234 | 0.87 | 0.24 | 0.55 |
| 5 | 0.81 | 0.43 | 0.47 |
| 134 | 0.81 | 0.23 | 0.45 |
| 13 | 0.81 | 0.24 | 0.45 |
